# Supplementary material
Source: PubMed Central journal article supplement (PMC3695288)
Supplement: ismej201320x1.pdf [file ismej201320x1.pdf]

Supplementary Table S1. Eukaryotic species detected in Rifle groundwater using non-specific primers targeting the 18S rRNA gene or the  $\beta$ -tubulin gene

| <b>Euglenozoa species</b> | <b>Land plants</b>       | <b>Alveolates</b>       | <b>Cercozoa</b>       |
|---------------------------|--------------------------|-------------------------|-----------------------|
| Andalucia godoyi          | Chlorokybus atmophyticus | Apicomplexa sp.         | Cercomonas sp.        |
| Jakoba incarcerata        | Ocimum basilicum         | Babesia caballi         | Paracercomonas filosa |
| Jakoba libera             | Ostreococcus sp.         | Brachionella sp.        | Cercozoa sp           |
| Leishmania infantum       | Selaginella lepidophylla | Caenomorphidae gen. sp. |                       |
| Naegleria gruberi         | Triticum aestivum        | Chilodonella uncinata   |                       |
| Trypanosoma congolense    |                          | Climacostomum virens    |                       |
|                           |                          | Colpoda maupasi         |                       |
|                           |                          | Cyclidium porcatum      |                       |
|                           |                          | Epalxella antiquorum    |                       |
|                           |                          | Euplotes aediculatus    |                       |
|                           |                          | Exuviaella pusilla      |                       |
|                           |                          | Gregarina blattarum     |                       |
|                           |                          | Halteria grandinella    |                       |
|                           |                          | Hemiurosoma terricola   |                       |
|                           |                          | Kahliella sp. TT2005    |                       |
|                           |                          | Lechriophyla mystax     |                       |
|                           |                          | Leptopharynx costatus   |                       |
|                           |                          | Litostomatea sp.        |                       |
|                           |                          | Loxodes striatus        |                       |
|                           |                          | Metopus palaeformis     |                       |
|                           |                          | Njinella prolifera      |                       |
|                           |                          | Nyctotherus cordiformis |                       |
|                           |                          | Nyctotherus ovalis      |                       |
|                           |                          | Oligohymenophorea sp.   |                       |
|                           |                          | Opisthnecta minima      |                       |
|                           |                          | Paramecium sp.          |                       |
|                           |                          | Pelagothrix alveolata   |                       |
|                           |                          | Perkinsus marinus       |                       |
|                           |                          | Phyllopharyngea sp.     |                       |
|                           |                          | Spirotontonia taiwanica |                       |
|                           |                          | Toxoplasma gondii       |                       |
|                           |                          | Trimyema compressum     |                       |
|                           |                          | Tunicothrix sp.         |                       |
|                           |                          | Uronema elegans         |                       |

**Stramenopiles**

Chrysophyceae sp.  
Ochromonadaceae sp. CCMP2298  
Ochromonas vasocystis  
Oikomonas sp. SA-2.1  
Paraphysomonas imperforata  
Paraphysomonas vestita  
Phaeodactylum sp.  
Phytophthora infestans  
Pirsonia verrucosa  
Pythiaceae sp.  
Spumella sp AR3A3  
Spumella sp.  
Synurophyceae sp.  
Tesselaria volvocina  
Thalassiosira pseudonana

**Fungi**

Cladosporium bruhnei  
Aureobasidium pullulans  
Alternaria sp. CBS 174.52  
Uncultured Dothideomycete clone SAWY4  
Puccinia graminis  
Chaetomium globosum  
Coprinopsis cinerea  
Pyrenophora sp.  
Schizophyllum sp.

**Metazoa**

Alcyonidium diaphanum  
Caenorhabditis japonica  
Catenula lemnae  
Crassostrea virginica  
Drosophila sp.  
Equus sp.  
Gallus gallus  
Helobdella robusta  
Ixodes scapularis  
Litopenaeus vannamei  
Loa loa  
Monosiga brevicollis  
Otolemur sp.  
Paracatenula urania  
Pomatoceros lamarckii  
Rheomorpha neiswestonovae  
Rhynchoscolex simplex  
Rutilus rutilus  
Salvelinus fontinalis  
Xenopus laevis

**Apusozoa**

Apusozoa sp. ATCC 50267

**Opisthokonta**

Choanoflagellida sp.

**Cryptomonads**

Cryptophyta sp.  
Goniomonas sp. ATCC 50108  
Cryptomonas paramecium

**Centroheliozoa**

Pterocystis sp NZ

**Oxymonadida**

Saccinobaculus doroxostylus

**unclassified Eukaryotes**

Trimastix pyriformis  
Breviata anathema

**Parabasalia**

Carpediemonas membranifera

Lacusteria cypriaca

Trichomonas vaginalis

**Diplomonads**

Enteromonas sp. CUORA

Giardia lamblia

Hexamita inflata

Trepomonas sp.

Trepomonas steinii

Trimitus sp. TRION

**Amoebozoa**

Protacanthamoeba bohemica

Thecamoeba aesculea

**Rhizaria**

Polycystinea sp.
