# Supplementary material
Source: PubMed Central journal article supplement (PMC3695288)
Supplement: ismej201320x6.pdf [file ismej201320x6.pdf]

Supplementary Figure S2. Breakdown of all of the eukaryotic species detected in (A) 18S rRNA gene clone libraries (1500 clones considered for this analysis) (B)  $\beta$ -tubulin gene clone libraries (500 clones considered for this analysis)

### 18S rRNA gene sequences

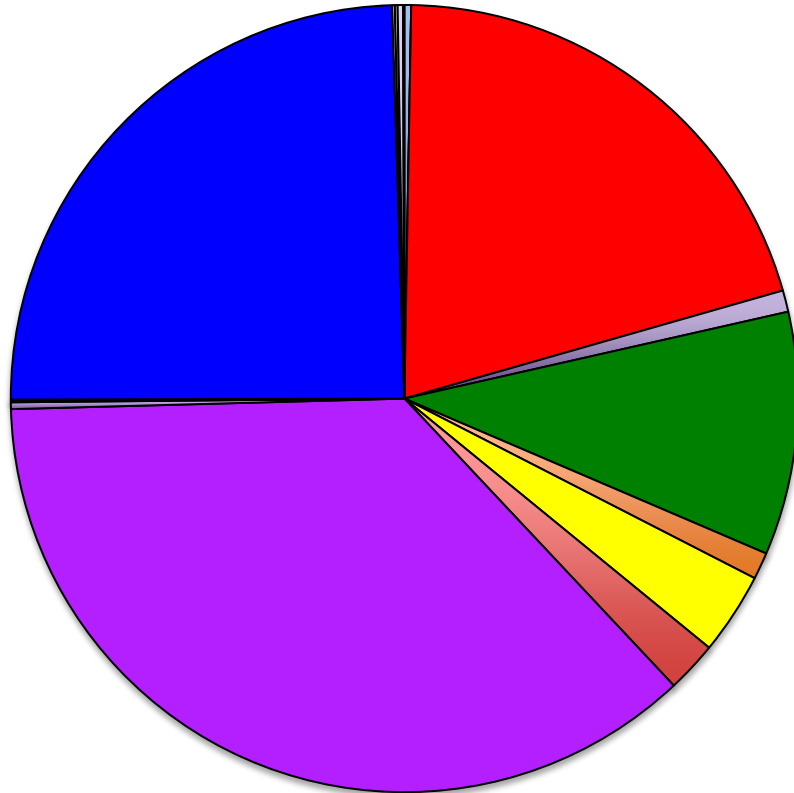

### $\beta$ -tubulin gene sequences

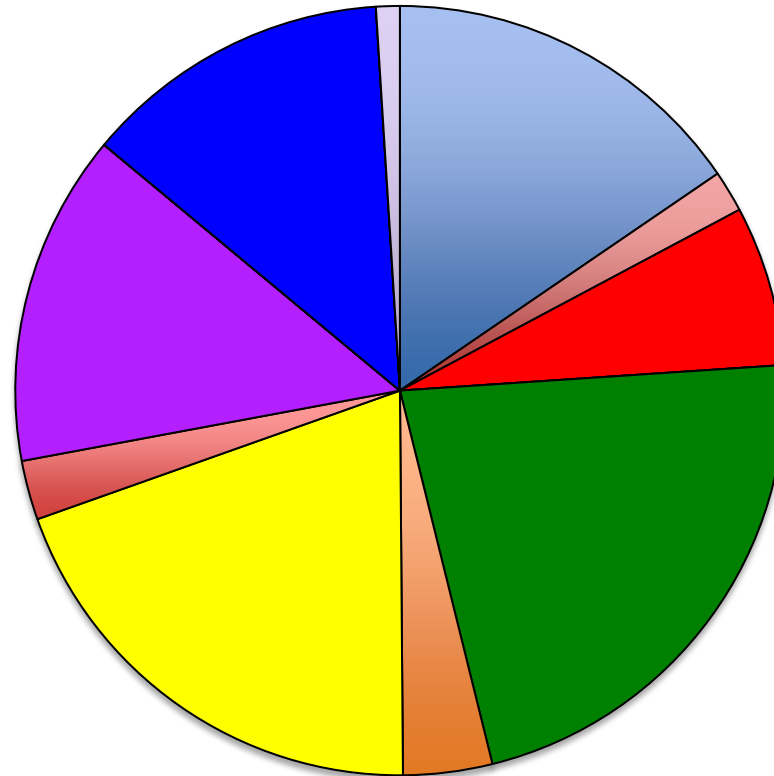

- Euglenozoa
- Land plants
- Alveolates
- Cercozoa
- Stramenopiles
- Fungi
- Metazoa
- Parabasalia
- Diplomonads
- Amoebozoa
- Centroheliozoa
- Oxymonadida
- unclassified Eukaryotes
- Apusozoa
- Opisthokonta
- Cryptomonads
- Rhizaria
