# Supplementary material
Source: PubMed Central journal article supplement (PMC3695288)

Supplementary Figure S3. Acetate (mM), Fe(II) ( $\mu\text{M}$ ) and  $\text{H}_2\text{S}$  ( $\mu\text{M}$ ) concentrations in the groundwater during the (A) 2010 and (B) 2011 field experiments conducted at the Old Rifle site.

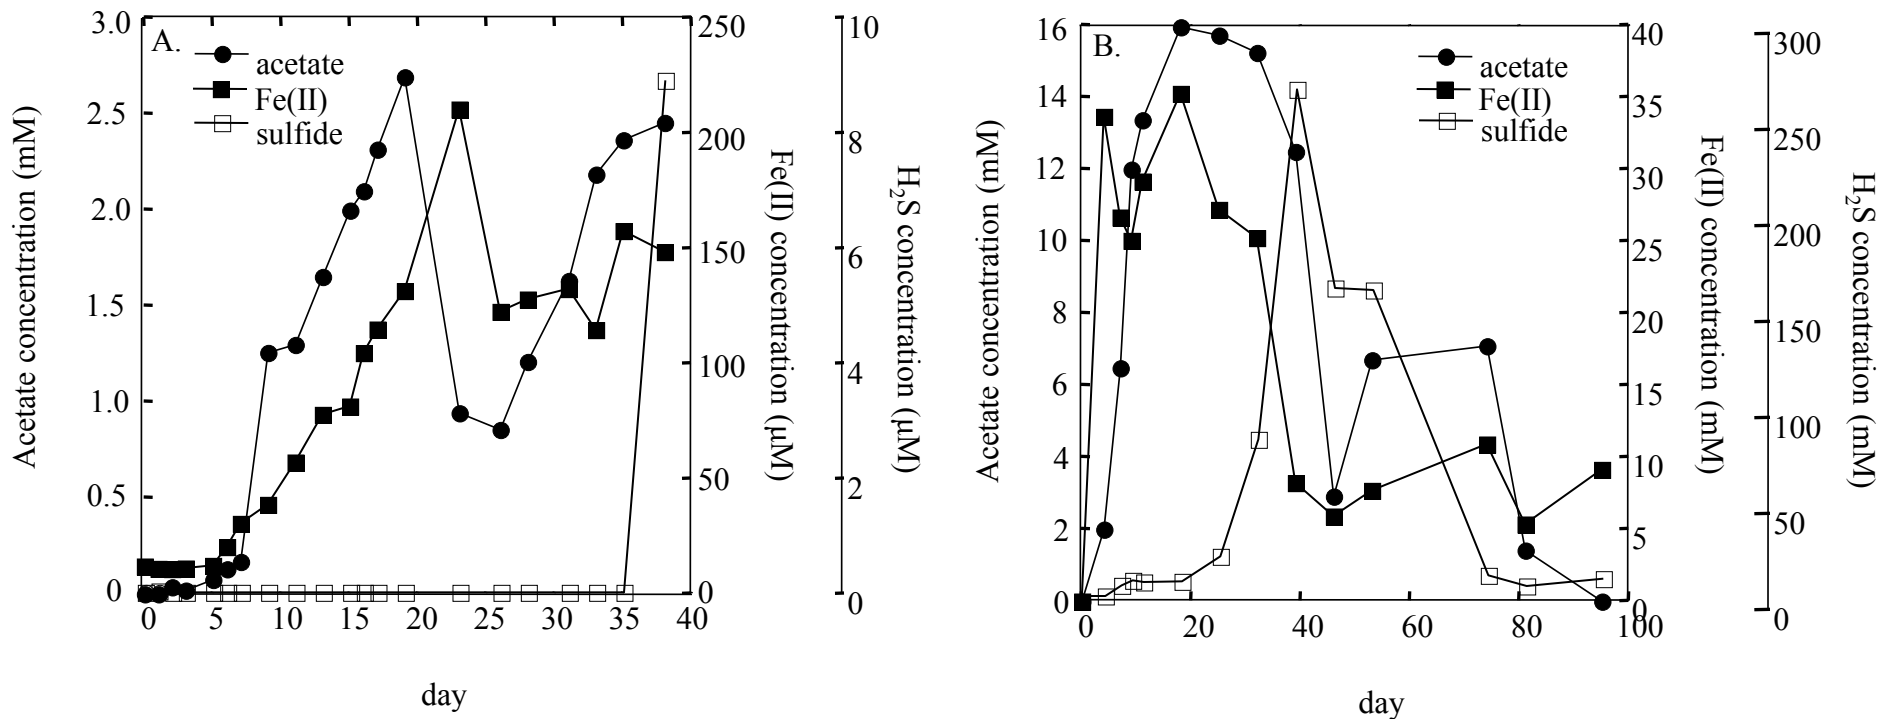

Supplement: ismej201320x7.pdf [file ismej201320x7.pdf]
